# Supplementary material for: Fabrication of Bilayer Magnetically Actuated L-Shaped Microrobot Based on Chitosan via Photolithography
Source: Polymers (Basel). 2022 Dec 15;14(24):5509. doi: 10.3390/polym14245509 (PMC9784805; doi:10.3390/polym14245509)
Supplement: Supplementary file 1 [file polymers-14-05509-s001.zip › polymers-2044980-supplementary.pdf]

Supplementary Material

# Fabrication of Bilayer Magnetically Actuated L-Shaped Microrobot Based on Chitosan via Photolithography

Haoying Wang <sup>1,\*</sup>, Xiaoxia Song <sup>1</sup>, Junfeng Xiong <sup>1</sup> and U Kei Cheang <sup>1,2,3,\*</sup>

<sup>1</sup> Department of Mechanical and Energy Engineering, Southern University of Science and Technology, Shenzhen 518055, China

<sup>2</sup> Shenzhen Key Laboratory of Biomimetic Robotics and Intelligent Systems, Southern University of Science and Technology, Shenzhen 518055, China

<sup>3</sup> Guangdong Provincial Key Laboratory of Human-Augmentation and Rehabilitation Robotics in Universities, Southern University of Science and Technology, Shenzhen 518055, China

\* Correspondence: wanghy3@sustech.edu.cn (H.W.); cheanguk@sustech.edu.cn (U.K.C.)

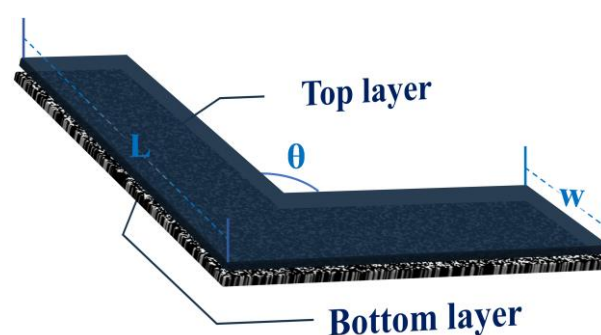

Figure S1. Structure of the L-shaped microrobot.

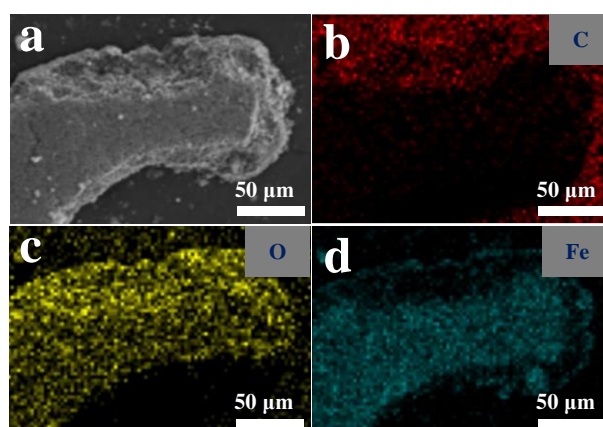

Figure S2. EDAX mapping of the tilted cross-section of a microrobot.

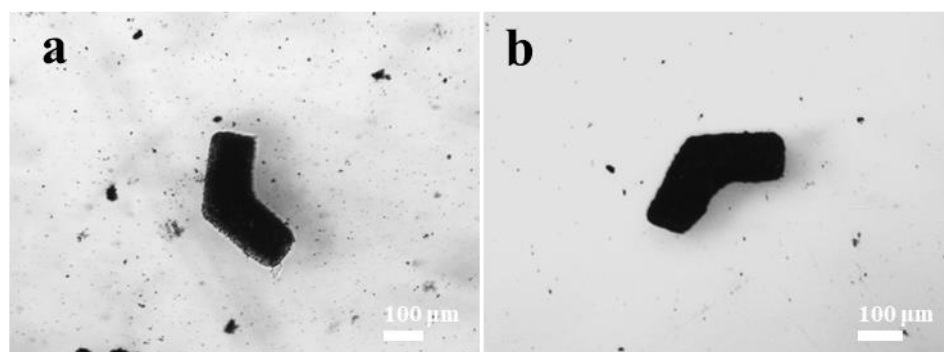

**Figure S3.** Optical images with 5× objective lens of microrobots after immersing in anticoagulant sheep blood (a) and mice serum (b) at 37 °C with rotating speed of 100 rpm for 24 h.

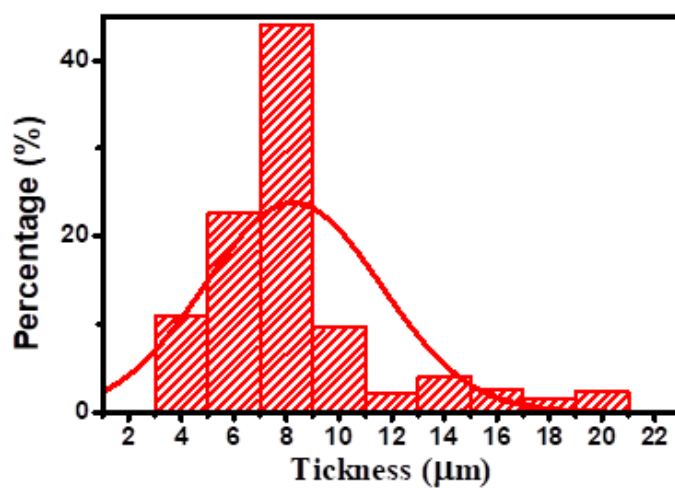

**Figure S4.** Thickness distribution of the top layer of microrobots in dry state.

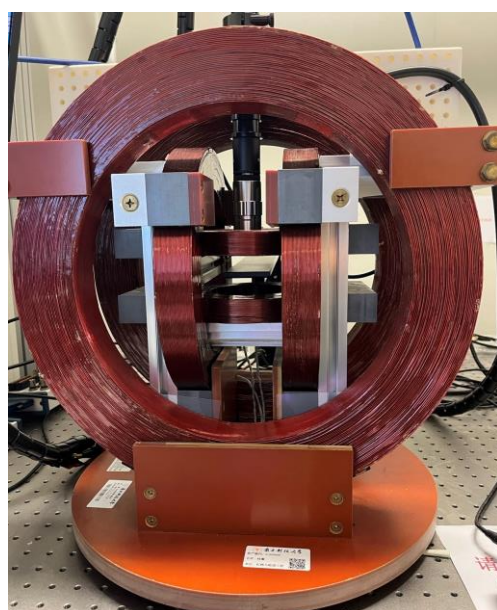

**Figure S5.** A 3D Helmholtz coil system.
